# Supplementary material for: Genetic Pathways and Functional Subnetworks for the Complex Nature of Bipolar Disorder in Genome-Wide Association Study
Source: Front Mol Neurosci. 2021 Nov 22;14:772584. doi: 10.3389/fnmol.2021.772584 (PMC8645771; doi:10.3389/fnmol.2021.772584)
Supplement: Supplementary file 1 [file Data_Sheet_1.csv]

Supplementary Data 1 | A total of 10,830 bipolar candidate genes were collected and prioritized from multiple dimensional data platforms. A combined score was calculated for each gene according to its magnitude of association integrated from GWA study, association studies, linkage scans, gene expression (both human and animal studies), literature search, and biological regulatory pathways.
gene	combined score
PIGK	35.08573359
DSCAM	34.26405795
EGR1	33.7287412
ANKRD27	32.91239736
ZNF274	32.84960872
ANTXR1	32.7013673
ANK3	32.68949695
HNRNPC	32.17032131
LRIG1	31.61468539
HTR3B	31.20411998
SIGLEC6	31.06919661
TRDN	30.45363222
JAM3	30.17363797
ADAMTS14	30.09566473
DPP10	30.01778098
ZNF224	29.94297788
TPH2	29.73032162
OR6S1	29.58427929
GRIK1	29.58082464
CMTM8	29.44225106
ARNTL	29.21552683
MOXD1	28.9049354
NEK4	28.87992119
SLC39A3	28.56204883
CCDC111	28.5547495
ATP1A3	28.48985638
ITIH1	28.34277687
CACNA1C	28.255269
PER3	28.21607587
PPP2R2B	28.17192717
ZNF331	28.16807596
MCTP1	28
PBRM1	28
CDC25B	27.72376695
DRD4	27.63552385
DAOA	27.61030719
PALB2	27.60409377
HTR6	27.58589917
KLK8	27.5373573
FAH	27.4946303
PTEN	27.40013922
IFNK	27.38845736
RNF141	27.33397428
NPAS3	26.92117941
CSF2RB	26.64437042
THRB	26.63423547
KITLG	26.57345987
UBR1	26.54211679
ABCG1	26.52890759
ZNF600	26.46024246
CCNB1IP1	26.37004836
ASTN2	26.36630712
KLHDC1	26.3487047
LAMP3	26.19932128
RPGRIP1	26.1056261
MAN2A1	26.10047264
ZNF222	26.04662964
PTPRE	25.99083471
MOBKL2B	25.94946619
MOCS2	25.88877782
SIGLEC12	25.88785188
6-Mar	25.8248302
ZNF284	25.81465158
CABLES1	25.8007287
BUB1B	25.78655291
FLVCR2	25.70547568
LSS	25.68795549
ANKMY1	25.63613793
PSME1	25.59046844
IMPA2	25.56991411
PTPRG	25.53597224
CHST11	25.4735949
PLCB1	25.408941
AKAP10	25.38936085
KCNQ3	25.13202029
ODZ3	25.10218309
RGS6	25.04102165
MYO3B	25.01043512
ATMIN	25
CENPN	25
TDRD9	25
PARP2	24.85308111
CDH18	24.85272719
DSE	24.83628969
CUGBP2	24.78464585
TGFB2	24.76809065
C6orf60	24.76551464
MCHR1	24.75821903
PREP	24.73585641
GRM1	24.69458146
ZNF223	24.61101776
ZNF385D	24.55592
ZNF787	24.29275114
DOCK2	24.26515372
ADCY9	24.24337817
CEBPG	24.23075432
MAP3K1	24.2208427
LRRC36	24.20110138
PEPD	24.18104804
FYN	24.09294583
LGMN	23.89955956
TH	23.85485784
SYNE1	23.84092357
TTC5	23.83730002
PDE4D	23.82871623
FAM20C	23.80093253
NALCN	23.70273917
FLJ43080	23.64777046
ZNF577	23.60288754
FIT1	23.58688944
DISC1	23.52155331
EMILIN2	23.5075463
ZNF649	23.5002855
MYT1L	23.44421574
GABRA4	23.41249337
MCM3AP	23.38817292
SYN3	23.378645
NUMB	23.36575573
SLC17A7	23.36563089
RNF31	23.36209904
GARNL1	23.34304443
BMP4	23.32417616
LIG1	23.31626172
CA12	23.29367902
PRODH	23.26498602
GRIA1	23.25059621
DTNBP1	23.24283463
KALRN	23.23665892
LHCGR	23.21559472
LRRC7	23.18409984
ANG	23.15508307
GCH1	23.15166814
ZNF234	23.12975099
L1TD1	23.09168281
ADAMTS1	23.04814884
BDNF	22.95997391
FHDC1	22.85105265
GRIN2B	22.7529239
CNTNAP5	22.75197194
PSME2	22.71909341
ZNF283	22.6899982
NRXN3	22.66549806
PPP2R1A	22.66392137
RHOBTB1	22.64505219
VAV3	22.62346863
HMCN1	22.62331023
AIM1	22.61654434
IL28A	22.59414366
NRG3	22.54989402
ARHGAP15	22.49763478
SULF1	22.48325266
RELN	22.46165216
SEPW1	22.4311153
FKBP5	22.41025169
AKT1	22.38226873
FHAD1	22.38149053
TRAF6	22.34996482
NR3C2	22.34273464
DLGAP5	22.24647533
DACT3	22.2324053
TGFB1	22.2131229
GRIK5	22.12053145
DACH1	22.08968319
ZNF365	22.0527244
TARBP1	22.03804022
SLC24A3	22.02059232
RYR1	21.99812809
ODZ4	21.99097819
PTPN2	21.98495843
DLG2	21.98437679
DLGAP1	21.96974469
CCDC88C	21.93118191
TP73	21.89475508
ACSL1	21.86758807
C11orf74	21.81722011
THOC1	21.76794399
GALNT10	21.76260897
DDX31	21.76054782
TRIM36	21.75611148
CHAT	21.72733756
MLF1IP	21.72234184
NDUFS4	21.72050731
ZNF490	21.70762298
ATP6V0D1	21.70629955
SNX29	21.67863152
AK5	21.6778086
DAO	21.65654752
KCNS1	21.65264693
HDAC2	21.60214186
SLC6A4	21.53841834
NOVA1	21.53086001
PYGB	21.52988363
IL15	21.51699573
ITIH3	21.51231682
RSHL1	21.48016958
KCNH5	21.47811713
TPD52	21.47771683
PPP2R5A	21.45365371
ITGA2	21.44281109
CIT	21.43826069
FAM158A	21.4283512
PTK2	21.4222886
TBC1D21	21.39507128
ZNF410	21.3826703
FNDC3B	21.36636396
DPEP2	21.3563061
GABRA1	21.35524273
MC2R	21.3254349
BSPH1	21.31722077
DHX34	21.31408097
ASF1A	21.31140492
PDXK	21.29546304
KCNN2	21.28998948
CSMD2	21.27368103
CLRN1	21.26764229
ZNF804A	21.24101847
KCNMA1	21.2376603
STXBP6	21.23308214
CDC42EP5	21.21666598
HSDL2	21.21301986
PCSK2	21.20186965
TMEM206	21.19983201
LIN7B	21.19323929
FBLN5	21.19210473
MCC	21.18804517
NOS1	21.1713613
NKAIN2	21.11620303
BCL9	21.09988514
PDE4B	21.09907503
SLC24A4	21.0982768
C1orf177	21.01020178
ITGBL1	21.00913028
MAOA	21.00798163
CHAF1B	20.97796246
TAF5L	20.96673874
FBXL17	20.95557067
TULP2	20.9462858
DENND3	20.90363119
ANKRD55	20.89096762
ZNF219	20.88967017
SPECC1	20.86367717
ZNF667	20.79946953
SLC16A10	20.79572344
UGT1A10	20.78613791
CDKN1A	20.77790119
NELL1	20.77085669
ZNF791	20.74983371
L3MBTL4	20.7418161
GRIN1	20.69099831
SLC10A7	20.67680721
NTRK2	20.67448434
PLSCR4	20.66324863
CLOCK	20.65010198
CDC27	20.64393647
GRIN2D	20.62998461
C20orf26	20.62534273
AJAP1	20.60771591
HCRTR1	20.60544551
PRKCH	20.58518912
PTGR2	20.55954698
BICD2	20.54768944
GRID1	20.53929991
SOX5	20.49466126
C10orf11	20.49011181
CD33	20.4784563
DGKH	20.47195192
ZNF175	20.45417029
RNF144A	20.44339034
TMEM17	20.44063611
FLJ40235	20.43345953
PAX7	20.41861029
COMMD10	20.41075049
CRHR1	20.40295279
RPL36AL	20.39646451
DCBLD1	20.38638205
NUP155	20.38149635
COL11A1	20.37853003
SEMA5A	20.35312601
FOXN3	20.34636206
CTNNA2	20.33997043
TGFB3	20.32593097
PDSS2	20.29272786
CDKAL1	20.28020258
NUP133	20.27018104
HSPG2	20.27009648
FRMD3	20.26413076
VAPA	20.26322576
MARCKS	20.26203408
PCDH15	20.25286922
TSLP	20.24501844
BMP7	20.22977662
MGAT4A	20.22889026
THSD7A	20.22822395
WDR62	20.19004857
PLD3	20.18998706
SLC1A5	20.17837713
PELO	20.13593231
SLC22A16	20.09809515
CA10	20.09544674
NLRP8	20.09158637
ITPR1	20.08762073
CCL4	20.08525894
SGCG	20.06247488
CPB2	20.04163313
PPAP2A	20.02403021
OPCML	20.0185621
GRM3	20.01016933
FOSB	20.00349646
CHST8	19.99592985
CLIP3	19.98054417
THAP8	19.9194928
ZNF146	19.91901821
7-Mar	19.89619755
SEMA6A	19.87994871
ADRA1D	19.87782905
GRAMD1A	19.85513273
A2BP1	19.84417696
C18orf1	19.79166956
FER	19.76560162
DAD1	19.74535957
RBMXL2	19.73573485
PDLIM5	19.7235382
UBE2W	19.71290614
TPH1	19.7013946
FBLN1	19.68566325
PARK2	19.68418771
C14orf159	19.6714828
DLST	19.6635169
HIST1H1E	19.64687167
ESR1	19.64329016
PXDN	19.63602613
RHOT1	19.62422953
CCDC33	19.61316048
PPIL5	19.57692911
CDH12	19.54820072
EPB41L4A	19.54503459
CSMD1	19.54410154
FBXO27	19.54113003
MMP14	19.53162841
MTNR1A	19.5283381
LRFN2	19.5268605
GABRA6	19.52066215
AHCYL1	19.50246582
ATP10B	19.50045294
TF	19.48595797
MGAT2	19.48104919
FAM161B	19.46936954
TPK1	19.4560788
MOV10L1	19.44487643
VNN3	19.43692695
FRK	19.39088836
PITPNC1	19.38116917
USP44	19.37755795
LAMA2	19.37071977
ZNF135	19.36557095
PRKG1	19.36250176
PRKD2	19.36030013
PCDH7	19.35291919
NRG1	19.34524943
P4HA3	19.34190668
ITSN1	19.33341266
SORBS2	19.31031733
PHF14	19.27623325
CLU	19.26848364
LARS2	19.25888714
GPBP1	19.24817768
CAMK2A	19.234662
TMEM108	19.22664791
FBXO38	19.20366835
ZC3HAV1	19.20214185
PARD3B	19.19315999
ENPP2	19.18911299
XRCC1	19.16849277
COQ6	19.14607192
ENTPD5	19.14577052
MCM9	19.1237687
RBM23	19.10799329
LYPD5	19.08365078
FOXO3	19.06908327
NRXN1	19.05776844
RGL4	19.05592408
ZNF480	19.04554142
ZNF766	19.04554142
BAI3	19.04385418
PTPRM	19.0431967
ESR2	19.03595905
DTL	19.02034807
MOCOS	19.01773327
FLJ37543	19.01715444
EVC	18.99762982
EFNA5	18.97013705
NTN4	18.96055574
POLRMT	18.95984072
GALNT13	18.95763666
EDNRA	18.94975501
ATXN1	18.9470569
DHRS2	18.94201716
BLK	18.93957775
C6orf190	18.91748243
WDFY4	18.90423
OPTN	18.89774571
HTT	18.89243236
G6PD	18.892331
DPF3	18.87339968
PLK2	18.85363214
BRE	18.84163751
ZNF530	18.82911877
TMCO4	18.82715548
SPINK7	18.82614853
SRRM1	18.80801738
EBF1	18.78820214
TTRAP	18.78032932
RHEBL1	18.7799897
MLL4	18.77774906
GALC	18.77232303
COLEC12	18.77124682
FBXL21	18.76013367
ADCY8	18.75106977
NR2E1	18.73875073
RNASE6	18.7326838
GRM7	18.72695892
ACCN4	18.72168201
MAPKAPK2	18.71598745
C6orf103	18.71572133
SPINT2	18.70822213
ACP1	18.70534138
CTNND2	18.70308573
PEX3	18.67900352
MIER3	18.67709136
HIF3A	18.67457356
RHD	18.65165549
NCOA6	18.65035587
TGIF1	18.64379364
TNF	18.62982681
CCNG1	18.62523866
SKI	18.62486952
CRX	18.62210954
CDH13	18.61732851
PPFIA3	18.61207587
ITK	18.6104149
HBP1	18.59830193
PRKD1	18.59256056
C14orf145	18.59214157
PPP2R4	18.57007439
ZNF575	18.56265341
FMNL2	18.5510099
CDO1	18.52651003
NTNG1	18.52098669
GPNMB	18.51483135
ZNF565	18.51048144
SYT5	18.50921989
C21orf56	18.50172321
ZNF415	18.49318203
ATXN10	18.48013999
MAN1A1	18.47760636
PIP4K2A	18.47355894
FGD2	18.46141953
HBXIP	18.45143782
NCAM1	18.44918109
PRKCB	18.43723641
NUP50	18.43297451
SLC7A7	18.43293166
ABCB1	18.4255541
NSF	18.41190064
BCR	18.41115776
MYH14	18.41075985
TGFBR2	18.40306197
FABP7	18.37847858
SSTR1	18.37446472
HPCAL1	18.3683529
PIK3C2G	18.35644936
HS6ST3	18.35635686
CDC42	18.34251452
GPD1L	18.3358771
ZFP161	18.3340084
SLC35F3	18.32550942
ITGA1	18.31739049
NUP214	18.30477518
USH2A	18.29267084
C14orf143	18.28735195
MTRR	18.28601254
POLE2	18.27929593
LRRC16A	18.25910764
PSG4	18.25262134
HLA-DRA	18.24295641
DEDD2	18.23423578
NRCAM	18.22848326
CNTNAP2	18.22468179
GPR50	18.2246034
PTPLA	18.19739122
EXOC4	18.19514058
STMN1	18.19176999
TBC1D9	18.19075971
PIGU	18.18570349
ZNF808	18.17900677
MSI1	18.17600457
TIAM1	18.17381891
ZNF813	18.16975395
CTNNBIP1	18.16869046
ADD2	18.16623324
STK24	18.16083991
CAST	18.15315637
PIP5KL1	18.14929972
PLCG1	18.14537735
STRN4	18.1428834
FAM5B	18.12652064
ARFIP1	18.121287
MACROD2	18.11954371
ZSCAN10	18.11087514
ZMIZ1	18.11086447
ZNF578	18.10982839
CSRP2BP	18.10417772
FHOD3	18.10278617
PPT1	18.09634726
CENPB	18.09506055
DHX29	18.08318346
ZNF233	18.08290126
CDC20B	18.07196863
FSCN1	18.05884813
MTHFD1	18.05026331
PTPRK	18.04921076
CHRNA2	18.04570649
UGT1A8	18.04253606
NLRP6	18.04132121
CRB1	18.03522991
BTN2A1	18.02342461
SNX14	18.01957132
CNKSR3	18.01661316
SNAP91	18.01051222
SORCS2	18.00451622
DFNB31	18
DPY19L3	18
APEX1	17.9977251
SIP1	17.99681382
APP	17.97637587
ALK	17.9708641
OSBPL1A	17.96468708
KIAA0319	17.96083456
CADM1	17.95007159
RBMS3	17.94156971
ZNF181	17.94021881
SH3BP5	17.9399595
NA	17.93854752
RPS29	17.93324416
C6orf225	17.93160152
BRD1	17.93118602
SERGEF	17.92501731
ELK3	17.91138159
ARL15	17.91015179
ENG	17.90893598
GPR156	17.90254601
C9orf72	17.89638925
PTGIR	17.89306754
BVES	17.89095599
RCAN1	17.88890977
NXPH2	17.87837615
NLRP5	17.86907088
NLRP13	17.86663056
PREX1	17.85926683
ZBED4	17.84861627
ITIH5	17.82141297
EPHB2	17.82093152
COL13A1	17.81256178
MYH7B	17.81015081
TRPV1	17.80546688
OR52I1	17.79709597
TRIM68	17.79709597
RASGRP3	17.7965374
GART	17.77328245
GSS	17.77032419
FAM135B	17.76994295
SIAE	17.75492342
MTCH1	17.74618626
FABP3	17.744616
LBA1	17.74003048
REV3L	17.73678178
IL6ST	17.72989799
TRPC4AP	17.72765155
CCDC123	17.71968888
TPD52L1	17.71089936
C19orf51	17.70983404
CFHR1	17.70393068
MPPED2	17.70077679
SLC37A1	17.6986898
AQP4	17.69067597
AKR1C1	17.68244883
GRIK2	17.67796845
ZCCHC2	17.67665716
CAP1	17.66941006
TUBE1	17.66188937
PRMT5	17.65383629
MDGA1	17.64491045
SPEF1	17.6419535
ADAMTSL1	17.64102949
KIAA0495	17.63554893
ZMYM4	17.63183537
HERC3	17.63026606
HS3ST5	17.62880268
CREM	17.61952598
MSRA	17.61561614
ZNF599	17.60140383
STX7	17.59796824
C19orf55	17.58706115
HSPB6	17.58706115
TSEN2	17.57493245
COL18A1	17.570658
CNTLN	17.56812408
LOC63920	17.56237324
C1orf32	17.53270975
FLJ10769	17.52880035
TYROBP	17.52636707
PSG11	17.5164584
KCNQ1	17.51608339
ZBTB32	17.51604342
HRASLS5	17.51603458
GABRG2	17.5069737
KIF1A	17.50346385
CTAGE4	17.50225538
HES5	17.49877941
NENF	17.49786268
CCKBR	17.49624401
TGFBRAP1	17.48991725
CCND2	17.4760537
GNAI3	17.47130883
C6orf89	17.46491799
CDH11	17.4555327
SH3GL2	17.45111682
SRP54	17.44353933
SAMD12	17.44329208
MGST2	17.4395037
IDH3A	17.4366948
PRL	17.43316602
ZCCHC24	17.43167259
SLIT3	17.43117051
HAS1	17.43100157
CDH19	17.43057244
SLC5A11	17.43005121
GNAL	17.42506717
FBLN2	17.42323932
SEC16A	17.41600148
OR2A1	17.40516451
OR2A42	17.40516451
CDK5	17.39999273
MKLN1	17.39164645
DMTF1	17.38631258
PSMD13	17.38485136
E2F2	17.38270353
BAZ1A	17.37787411
COX7B2	17.3534133
TG	17.35131104
DYNLRB1	17.34590267
HIST1H2AK	17.34018741
OR2A25	17.33173495
SPRED2	17.33151116
MX1	17.33033181
SLC25A21	17.32660217
DAB1	17.3115177
RFX4	17.30677595
KY	17.30478781
ADRA1B	17.30140971
FGF12	17.29488198
MYH9	17.29092513
TLL2	17.2761188
ZNF132	17.27440097
SLC17A4	17.26793842
SOS1	17.24806605
GAPDHS	17.24702397
TMEM147	17.24702397
C9orf167	17.24214013
CTNNBL1	17.23642435
FGF20	17.23376066
PAPLN	17.22317411
FUT8	17.21654874
SEZ6L	17.21476879
SLC2A5	17.20826208
RAF1	17.20750902
OSBPL10	17.19773802
METTL3	17.19496521
COMT	17.17547208
MYPN	17.17122986
EHD2	17.16881556
HIST1H4H	17.16476759
ITGB2	17.16215603
HDAC4	17.15959392
DPAGT1	17.15449662
HPN	17.15249942
SLC6A11	17.14763884
HECA	17.1444797
CCL18	17.13514016
MAT2B	17.13293491
IL28RA	17.12324761
ZNF324	17.11553683
GDF10	17.11165993
COL19A1	17.11009772
RGS4	17.10568394
ABCC6	17.10353947
FPR3	17.10336898
CDAN1	17.1013255
DYRK3	17.09928188
ZNF610	17.09537512
OR2A7	17.09268302
CREBBP	17.09086875
TNFRSF8	17.08713984
PARVB	17.08445393
FXYD3	17.07458175
FARP1	17.07449603
MBOAT1	17.06791055
TNFRSF25	17.06281063
MAG	17.06017243
HOMER1	17.04978706
BCL3	17.04743447
SDK1	17.04028117
KLK12	17.03935341
PAX9	17.03895832
CDKN2B	17.03855609
GRIA4	17.03254965
OR52I2	17.0212949
ZNF564	17.01435506
IL2RA	17.01366307
HIVEP3	17.01287623
CACNA1A	16.99404584
DHH	16.992103
BRAF	16.98400446
ADRBK2	16.97837937
FLJ14213	16.97112862
CAMTA1	16.96813751
ZNF382	16.96533662
ANAPC13	16.94229305
GRHL3	16.93476518
OSGEP	16.93335378
KCNC3	16.93021952
ROR1	16.92480708
SGPL1	16.91830347
ZNF180	16.91451272
NCAM2	16.91174925
GABRB2	16.90760706
SLC6A17	16.9037026
GALR1	16.90257621
MRPS22	16.89861436
CAMSAP1L1	16.89252883
SULT2B1	16.88721045
LSAMP	16.88181706
NFKBIA	16.87870888
UTS2	16.87474808
DOC2A	16.86433964
SLC17A1	16.86431221
PAFAH1B3	16.86136581
DERL3	16.84353128
CYS1	16.8431993
CDC2	16.84177451
PLCB4	16.83749936
MRS2	16.82493781
ADIPOR1	16.81782194
GABBR1	16.81713342
DUSP14	16.80428858
UBE2S	16.80054567
UBE2N	16.7962089
TAOK2	16.78763802
ZNF816A	16.78709441
TPO	16.78214237
ABHD4	16.77156431
TSHR	16.76748737
EFR3A	16.76472997
PHF21B	16.75427064
RAPGEF4	16.75381264
ZNF160	16.74944546
ZNF792	16.73586849
CDH8	16.7356881
LSM6	16.73276238
DFNA5	16.73236377
AEBP2	16.73060202
DEAF1	16.72641982
RNF169	16.72578734
LAMA4	16.7230644
SOX11	16.72241141
RNASE1	16.71599291
OLFM3	16.71237839
NAPG	16.71001268
LIN7A	16.70819979
KIAA0133	16.70492374
FAM13C1	16.70334294
MYOM1	16.69958551
SFXN5	16.69447882
FAAH	16.69301456
PAX5	16.69135421
VNN1	16.68506502
TDP1	16.68042042
ZNF584	16.66730983
PRDM1	16.66606777
NFKBIB	16.6623818
CPNE5	16.66121804
C5orf29	16.66086811
SNX25	16.66048945
DHX8	16.65529499
MFN2	16.65226189
PEX14	16.64984654
MYO5B	16.64919823
MOBKL1B	16.64451484
TEK	16.64003034
USP1	16.6352754
RAB31	16.63414412
CSDA	16.63234956
MPPE1	16.63105975
SIGLEC9	16.6199971
EDEM2	16.61874102
USP38	16.61566823
DNHD1	16.6128553
RNASE7	16.60807349
NPC1	16.60648184
C20orf70	16.60638844
CNGA3	16.60585543
HIST1H2BN	16.60515034
FUCA2	16.60391355
RBM16	16.59884245
AIF1	16.59072981
MYH7	16.58953726
KNTC1	16.58842309
RAB33B	16.58789747
HUNK	16.58761502
TOPBP1	16.58572048
IHPK3	16.57133244
ABP1	16.56701966
ZNF761	16.56592523
DHRS4	16.56572925
CCL7	16.56508244
NLRP7	16.56458578
BCL2L2	16.56329124
ZFHX4	16.54284393
TRIM2	16.54162625
PTPRR	16.52820262
MAEL	16.52478171
DRD2	16.52425559
ZNF567	16.52285113
PDGFD	16.5164347
HIST1H2AB	16.51335042
SMARCB1	16.50845728
CABP5	16.50371655
SEC23A	16.50186514
GRK5	16.49577624
YTHDC2	16.48827821
MYT1	16.48321381
PCDH9	16.48242211
FNBP1	16.47989669
ZFP112	16.47924742
EGLN3	16.46900519
RSPO3	16.46787486
BCL2	16.46615908
ZNF461	16.46257494
SPR	16.45592821
SERPINI1	16.45433639
ETV6	16.4478974
AMBRA1	16.44610462
FGGY	16.44445551
MKRN2	16.44297307
KLK14	16.44012652
EPHB1	16.43407764
LEPR	16.43137904
BACE2	16.42103123
QPCTL	16.41706211
BAX	16.41137017
RUVBL2	16.40773672
TSPO	16.4059781
FGB	16.40258986
PGGT1B	16.40195256
MKKS	16.39033821
SPTBN1	16.39000265
AMPH	16.38904067
7A5	16.38847607
HTR1A	16.38739507
LRP3	16.38614589
LILRA4	16.38600802
HIRIP3	16.38262582
IPPK	16.3790304
FAM5C	16.37837972
DEPDC1B	16.36432788
PRDM2	16.36234846
MUSK	16.35725606
RORA	16.35392917
DDC	16.34764948
PSMD8	16.34752635
EIF2AK1	16.34687802
JDP2	16.34463612
MEIS1	16.34340346
ACSS3	16.34024983
CEACAM5	16.32781806
CENTG2	16.32684834
LPIN2	16.32559068
CCBE1	16.31971791
RPS11	16.31446113
CHL1	16.3140509
NBL1	16.31371302
GSK3B	16.30089327
PIK3C3	16.29709947
OR10G2	16.28833859
ZNF446	16.28441188
CSE1L	16.28262958
GNB1	16.27030727
SMAD2	16.26358845
UTRN	16.26152102
BGLAP	16.26060706
TNFSF13	16.25863643
PLCL2	16.25553562
DCDC2	16.25494312
TBXAS1	16.24285355
OSBPL3	16.23567958
GLTSCR2	16.23333811
ANXA13	16.23276406
GOPC	16.23069653
HOMEZ	16.22465897
SOCS2	16.22443696
ERCC2	16.22008382
TTC9	16.2193504
LRP8	16.21758724
GTF2A1L	16.21559472
CYP2B6	16.21552576
TTLL10	16.21507816
SLC30A9	16.21214599
HORMAD2	16.20657575
CASP9	16.20600766
COL22A1	16.20137726
DPP6	16.19789186
SPTBN4	16.19752532
GGN	16.19398832
KLK13	16.19219488
MAOB	16.18126868
TCF4	16.18069771
CD74	16.17821044
RPL13A	16.17520861
DPF1	16.17320549
NT5DC1	16.16881938
BTN3A2	16.16665203
IL1R2	16.1591403
BTN3A1	16.15813794
SLC35F1	16.15720768
RALBP1	16.15047861
AKT2	16.13985064
ZNF260	16.13582537
ERG	16.1343824
MDGA2	16.13208602
ADAM17	16.12520453
RERE	16.12423693
GLDC	16.12148782
TMEM2	16.12094551
NEDD4L	16.11649515
SLC6A3	16.1121894
NUDT19	16.11141631
DSG2	16.10381914
CACNG6	16.10165516
LINGO2	16.09386065
CST5	16.09357438
F11	16.09350547
POPDC3	16.09349524
CCRN4L	16.08876677
SCOC	16.08813344
PWP2	16.08709524
RYR3	16.08081529
C7orf23	16.07014132
HFE	16.06980064
C6orf186	16.0612717
FADS2	16.05947608
ORC4L	16.0581212
ZBTB44	16.05703722
CER1	16.05687727
PAK4	16.05321689
GNL3	16.05151226
SMPD3	16.05045276
ZNF532	16.04928815
GPATCH1	16.04892615
ADCY2	16.04453971
PCLO	16.04277654
DSG4	16.0388792
CLINT1	16.02977046
FBXW7	16.0260955
CYB5R1	16.02229769
PGM3	16.01684439
DMGDH	15.99958812
PRSS35	15.99882106
AIG1	15.9976784
CREB3L2	15.98769436
FRYL	15.98442223
CD22	15.98402795
FRAS1	15.98280883
VWA3B	15.98066683
MTHFSD	15.977243
TMEM132B	15.97691792
ADCK1	15.97281114
FERMT1	15.96970626
NDUFV2	15.96857651
COLEC11	15.96751584
INPP4B	15.96334388
BSN	15.9589596
PPP4R2	15.95439295
CAPN3	15.95037385
SLC17A3	15.95017574
CAB39	15.94546017
RYR2	15.93741367
ADCYAP1	15.93349295
PPFIA2	15.93327668
ELMO1	15.91954243
ZNF571	15.91711428
SND1	15.91151116
ROS1	15.90015745
SMARCA5	15.89898561
NFIA	15.8979222
PRMT6	15.89523789
CYP19A1	15.89523555
GYS1	15.89411098
SKIV2L2	15.89112267
CALM3	15.89106975
RAB3C	15.8901429
STAMBP	15.88957065
KIAA1305	15.88808388
HS3ST4	15.88648028
GRM4	15.88174673
SAMD4A	15.88161684
ITCH	15.86723523
PRKAR2B	15.86553679
GPI	15.86082662
RAB12	15.85939039
BTN2A2	15.85717277
FABP5	15.84618915
NF1	15.84354762
ADARB1	15.83827932
SCN9A	15.83766296
MAPK4	15.83672763
RASSF9	15.83445351
CD27	15.83330806
HIST1H3B	15.82930236
KCNK9	15.8260096
SET	15.82006169
ADAMTS2	15.81983324
XYLB	15.818981
TMED10	15.81892582
KIF27	15.8048892
HIST1H4B	15.79899513
BTN2A3	15.79791162
NARG1	15.79702869
IGFBP4	15.79661629
FPR1	15.79176812
RIPK3	15.79104104
DBP	15.79031507
RHPN2	15.78353899
TLR2	15.77740439
SFMBT2	15.76940914
RASGRP4	15.76612454
CNTFR	15.76485236
KCNK10	15.76200542
GYPA	15.75734148
OR2A14	15.75119445
RPS5	15.74958349
VASP	15.74898285
HCCA2	15.74844595
VN1R4	15.74546247
ALDH6A1	15.74146885
IL4I1	15.7334083
AVEN	15.73235558
SULT2A1	15.73125565
ZNF582	15.72715617
SLC25A33	15.72502069
CTSG	15.71827341
SOD1	15.71639463
SLC18A2	15.71211662
RALYL	15.70892806
TNNT1	15.69702465
CACNG7	15.69575783
HEBP2	15.6809894
SIGLEC5	15.68048681
MZF1	15.67774127
GAS7	15.66862253
SLC25A44	15.66708662
TSPYL4	15.66210258
SLCO3A1	15.65973366
SPINK9	15.65707167
PDCD6IP	15.65085403
DPM2	15.65036008
TCEA3	15.64683382
MIPOL1	15.63994225
LOC165186	15.6388585
TPX2	15.63657333
POLR1A	15.63550196
DENND1B	15.63537942
C19orf12	15.63335503
CR1	15.63234708
ARHGAP10	15.62964749
ALDH5A1	15.62650837
EIF4G3	15.6256805
COL29A1	15.62395511
STX8	15.60961347
MGC16169	15.60561595
DNAH5	15.59306654
DGKI	15.59153425
DPYSL4	15.58944651
STK32C	15.58339661
HINT3	15.57766355
IL6R	15.57569514
CCDC95	15.57093313
SIAH2	15.57044113
LRRC8D	15.56360183
NR5A1	15.55839411
RAB4B	15.54478606
AGPAT9	15.5443424
ZDHHC21	15.5428816
KIF17	15.54090392
MC5R	15.54030543
VAMP3	15.53913324
SNW1	15.53839703
ZNF507	15.53337819
BAI1	15.52501913
KLK7	15.52298151
ROCK1	15.51892693
PMPCB	15.51727534
PARP8	15.51709336
IL31RA	15.51544994
C9orf85	15.50723537
SIK2	15.50653148
MOBP	15.50235023
CCL20	15.50230599
KIR3DX1	15.49980383
RIN3	15.49809414
MARK2	15.49671686
PTPRT	15.49442745
KDM1A	15.49086535
INSR	15.48927314
SCUBE1	15.48789852
NPAS2	15.48765507
MYB	15.48448366
L3MBTL3	15.48417124
CDV3	15.47819947
SYMPK	15.47551003
FAM59A	15.4706325
PCBP3	15.46452513
DIP2A	15.45886672
GMIP	15.44921207
ARHGAP18	15.44597001
SIRT4	15.44510491
FDFT1	15.43928421
IFNGR2	15.43312885
FOXP2	15.43272621
PGF	15.42850042
SLC4A4	15.42666232
ALAS1	15.40950856
GSK3A	15.40828861
PAK7	15.40552516
RHBG	15.40527832
METAP2	15.40511265
TAAR2	15.4029292
TTYH1	15.39799045
TBC1D22A	15.39618698
DDR2	15.39551345
NUMBL	15.39462765
TRIM6	15.39428269
DENND4C	15.3901832
KHDRBS3	15.38765966
ARFGEF2	15.38666843
KIAA1128	15.38642631
SLC2A13	15.38501163
PLEKHA4	15.38438333
GZMA	15.37977021
CCL5	15.37704189
PJA2	15.3760116
SDCCAG1	15.36151067
RNF150	15.35649812
NOTCH2	15.35384053
SKP1	15.35111784
FRMD6	15.34892205
LRBA	15.3472169
MAD1L1	15.34639942
TMEM154	15.33622811
APOE	15.33522813
ACCN1	15.32729497
RHEB	15.32448824
LPHN2	15.32029119
CEACAM19	15.31994602
E2F3	15.31904547
HMMR	15.31816388
C5orf43	15.31743129
PCNT	15.31523023
KLC3	15.31517052
IGF1R	15.3076828
LILRB4	15.30389986
CTSB	15.30212456
OXA1L	15.29843324
AP1GBP1	15.29591193
HIVEP2	15.29320497
SFRS5	15.28534258
ZNF184	15.28434807
EFS	15.2838879
LOC283514	15.28317059
C11orf53	15.27956161
ZNF551	15.27884292
FGD5	15.27823606
CCT3	15.27331997
ADORA3	15.27043221
PRDM15	15.26405496
GABRA5	15.2639885
IL10RB	15.26030346
ZC3H4	15.25378205
RCAN3	15.25048238
ELP2	15.24151275
MTHFR	15.23492585
DPRX	15.23216793
C5orf35	15.23192629
C19orf54	15.22989897
C18orf45	15.22915907
LILRA1	15.22380508
TMEM219	15.22324522
LSM8	15.22153459
SNRPA	15.22109153
MARK4	15.22057244
NDFIP2	15.21086842
VN1R2	15.20778033
SLC7A8	15.20400623
RNF175	15.19986876
NDUFAF2	15.19645724
LPGAT1	15.19525091
RAI1	15.1944326
TNS1	15.19265723
C6orf129	15.184703
CCNT1	15.18418948
EXOC5	15.17860232
STAT1	15.17602784
ITSN2	15.17443444
ZNF765	15.17093524
HIST1H4L	15.17024577
ZNF302	15.1687282
RHOJ	15.15774119
MRPS27	15.1529094
TTC26	15.15104735
ERGIC1	15.14547751
ZNF566	15.1438871
CDC42BPA	15.14338834
RNASE9	15.14315682
CHRFAM7A	15.14127397
KIAA0247	15.14081636
PLAA	15.1354048
ZNF285	15.1333315
EPDR1	15.12882362
ZNF777	15.12868118
ZNF165	15.1284853
ZDHHC14	15.12521163
ODF1	15.12366603
DHX33	15.12012065
SLC8A3	15.11356969
CCDC149	15.11161056
ACRV1	15.11145274
SYNJ2BP	15.11097304
PTPRN2	15.09737372
ZNF192	15.09665717
LGR6	15.09623061
NR3C1	15.09487732
FRY	15.09453664
EPB41L3	15.09045209
RUNDC3B	15.08932253
TTC15	15.08715366
IL20RA	15.08506594
CTNNA3	15.07790137
SYT3	15.07659393
POLS	15.07176589
RNASE11	15.07084755
RNASE12	15.07084755
YAP1	15.07070719
DUSP6	15.06477893
DDX1	15.06419327
LRRC4C	15.0591879
SRP72	15.05596029
CAMK1D	15.05336702
RRM1	15.0499516
PCNX	15.04429131
IL11	15.04318972
ZNF547	15.04044477
PTPRB	15.03866973
CELSR1	15.03625518
KRT17	15.03040529
HES1	15.02739818
GPX5	15.02634512
NUDCD2	15.02196783
KLK6	15.01927789
FAM172A	15.01306808
ETV2	15.00795644
CARD8	15.00610909
NPS	15.0049538
DYM	14.9972811
ELSPBP1	14.99708613
THAP11	14.9963126
TWF1	14.99459136
C1orf130	14.99028469
RTN4IP1	14.98822121
PDE1C	14.98331743
MBL2	14.98131631
NUP62	14.98042593
ST6GALNAC4	14.97195278
MAML3	14.97018146
PLA2G4C	14.9681755
TRHDE	14.96649856
ESM1	14.96641907
FOLH1	14.96469512
DHRS1	14.96146475
DTNA	14.9591044
NKAIN3	14.95867886
FLJ16165	14.95699914
PDGFRB	14.95522155
CDS2	14.95485477
ZNF229	14.95273075
LRRC16B	14.95062183
LYPD6	14.93775214
RASSF3	14.9361348
LRRC40	14.93382974
DOCK7	14.93204087
PARVG	14.91873338
KLK15	14.91812861
GAB1	14.91744941
SDCCAG10	14.91486443
TTC29	14.91447385
WARS2	14.91443116
LRP2BP	14.91260033
NUTF2	14.9114542
KIAA0427	14.90822842
NME7	14.90704196
ZNF444	14.90624325
HTR2C	14.9045583
FBXO34	14.90394701
SAE1	14.90259991
UBAP2	14.90126399
INTS6	14.90052856
FAM65B	14.90022048
QKI	14.90006198
SCML4	14.89856012
PLA2G4A	14.8913076
MLL2	14.88335403
MLN	14.88238098
DYRK1B	14.88086432
CA8	14.87740724
ANXA10	14.87677479
PSEN1	14.87674834
GPATCH8	14.8737997
LHB	14.87358473
HIST1H3H	14.87273666
ZNF134	14.86916309
IVD	14.86497372
UBLCP1	14.86470768
SPTLC3	14.86094714
CNP	14.85971586
MYBPC2	14.85898985
PRKCG	14.85527724
RGL1	14.85511148
CDK3	14.85353148
UQCC	14.85348114
MBNL2	14.85248683
BFSP1	14.85240632
SRR	14.83721326
ZNF613	14.83599577
ITGA9	14.83398855
MTMR3	14.82768174
GPR109B	14.82496238
DRD1	14.82217091
PPM1B	14.81610425
ADAM9	14.81513708
KCNK1	14.81512558
RNASE8	14.81286751
GRM8	14.81205328
HIST1H2AG	14.80786519
BCL11B	14.80527208
IL29	14.80433713
KSR1	14.80396496
PTPRD	14.80115671
RASSF4	14.80056807
ADRA2A	14.79964954
ASTN1	14.79896686
TTBK2	14.79595024
ERCC8	14.79501154
EXOC6B	14.79236171
CCL2	14.78941597
CCDC88A	14.78940083
C15orf23	14.78909203
ARHGEF10	14.78411085
FAM26F	14.78387394
NLRP11	14.78318861
LRRC31	14.7792619
AHR	14.77807601
PPP2R5C	14.77589403
CEACAM20	14.77534227
NIPBL	14.77338511
MAPK12	14.75901916
SLC25A12	14.75832719
OR6Y1	14.75779098
WWC2	14.75464178
DCC	14.75387878
DCP2	14.75134137
C18orf62	14.74829276
CBLC	14.74687629
SIGLEC7	14.74675059
SLC1A2	14.7454615
PTTG1	14.74252227
TSPYL1	14.7387683
FST	14.7382748
CRYBA4	14.73743129
MIB1	14.73308564
PNPLA1	14.73283703
KLF12	14.73130267
WIPI1	14.72885045
CHCHD3	14.72559512
CELSR2	14.72435827
PRRX2	14.72150767
ATXN7L1	14.72086503
GPSM2	14.71879089
TRIM6-TRIM34	14.70920904
C6orf170	14.70790509
FIZ1	14.70786988
RAB11FIP5	14.70396395
BCKDHA	14.70254167
OSBPL9	14.69916299
SP110	14.69595097
KIAA0831	14.68841511
TGM4	14.68769927
SGK3	14.68459463
CCDC129	14.68333321
LSM14A	14.68145721
RALGPS1	14.67627539
CNTN5	14.67557466
RAP1GAP	14.670041
SCPEP1	14.66895768
HIST1H2BL	14.65855919
HIST1H2AI	14.65828459
HIST1H2AE	14.65386831
ATXN3	14.65331494
ZNF592	14.64906955
NCOA7	14.64771869
MBOAT7	14.64544181
KIAA0776	14.63693635
FCGBP	14.63595844
KLK1	14.63246568
HTR2A	14.6307705
LRRFIP1	14.63031524
SIPA1L2	14.62939847
BMP6	14.62841606
FBL	14.62661769
ETFB	14.62405514
CHCHD6	14.62263889
FFAR1	14.61769666
ADCY4	14.61446203
CR2	14.61440586
MCHR2	14.61439373
PCP4	14.61180658
BMP2	14.6095748
PDIA5	14.60590409
APC	14.60024125
SOBP	14.59968287
CRYBB1	14.59861663
SLC6A2	14.59846647
LIN52	14.59799808
DOCK4	14.5944775
SLC17A2	14.59439672
RAD51L1	14.58070304
AP2S1	14.57262827
ACOX3	14.57193654
PPP1R12C	14.56981546
LCLAT1	14.56884073
CAPN7	14.56054646
EPN2	14.55261772
NXPH1	14.55126815
PRDM16	14.55058698
GLP2R	14.5433551
PPP2R2C	14.5433422
C21orf34	14.54278825
FAM166A	14.53639678
TUBB2C	14.53639678
FRMD5	14.53570179
NAMPT	14.53561996
IDO2	14.53532499
LTBP2	14.53488436
BBC3	14.53326998
DIAPH3	14.53095931
DPYSL5	14.52989269
KIAA0355	14.52867886
SLC7A9	14.52430479
TNNC2	14.52309024
GFRA1	14.51690293
LILRA2	14.51663632
LRFN5	14.51607045
ATP1B2	14.51531371
GLIS1	14.51126141
ZNF598	14.51076534
HTR5A	14.50849264
ARID4A	14.50636516
RARB	14.50610423
VSX2	14.50365299
SLC38A9	14.49814728
NEK3	14.49751935
SIL1	14.49708696
CYP2S1	14.49420317
CLASP2	14.49322635
LAMA1	14.49199893
ZNF34	14.48947782
IL20	14.48909448
TGFBR3	14.48788324
IFNGR1	14.48634186
ZNF583	14.47922433
IFT74	14.47850134
WDR73	14.47415286
PDPN	14.47406613
C10orf79	14.47074663
SIRPB1	14.4691414
ZNF347	14.46808776
PXMP3	14.46671853
GAP43	14.4650471
NLRP14	14.46358977
EIF2C2	14.46134577
PLA2G2A	14.46134101
CARS	14.45546731
CIR	14.45050122
BRUNOL4	14.44159768
ELOVL7	14.43362654
CLCN6	14.43151153
ZNF28	14.43097068
SNX18	14.42694508
MX2	14.42562676
NPHS1	14.42525983
PNMT	14.42160745
LAIR2	14.42031917
MEGF8	14.42028412
OR5AU1	14.42028412
SNX3	14.4192349
AOF1	14.41395887
FLJ46481	14.41364352
SOX30	14.41109893
CPNE4	14.41079231
RPLP0	14.40438905
MAPK8IP3	14.39776485
S100B	14.39750549
ITPR2	14.39263736
ADH6	14.38922926
ZNF569	14.3873634
STAG1	14.38098957
NPR3	14.37368781
MLH3	14.37340352
IGSF21	14.3662731
SIRT3	14.36116523
DLG5	14.36101272
BXDC1	14.35516792
CASP3	14.35473661
SMOC1	14.353506
CXCL12	14.35312619
ZNF8	14.35141337
TMEM200A	14.3494345
LOC284402	14.34891871
SLC10A1	14.34874925
CUX1	14.34836105
FPR2	14.34833116
SYNE2	14.34766696
CCNJL	14.34672647
SGMS1	14.34666363
CSF1R	14.33460534
FLJ46082	14.33363958
VSX1	14.33106623
TRAF5	14.33082583
DRD3	14.32837036
AMD1	14.32826537
SGTA	14.32587024
SLC2A9	14.32557582
ARHGEF12	14.32454498
KLF9	14.32280399
STAT3	14.32043893
PELI2	14.31963481
CST2	14.31911894
GPC5	14.31130535
PSKH1	14.30699125
ENOX1	14.30690783
ZNF468	14.3053303
ATP2C1	14.30222168
VWA3A	14.29892928
GPR32	14.29879812
SLC39A6	14.29802067
BCAM	14.29745979
C1QTNF2	14.29680844
OPA3	14.29647549
CAPN9	14.29098503
SYPL2	14.28953008
STK4	14.28732868
SLC30A7	14.28627133
WDFY2	14.28614245
ZNF471	14.28431467
CRY2	14.28278769
VCPIP1	14.28130936
C14orf100	14.28007074
MFHAS1	14.27412296
ST6GALNAC3	14.26863943
RNPEPL1	14.26529467
GM2A	14.263586
WNK2	14.26139892
KIAA1553	14.26064871
TMPRSS2	14.23764953
LGALS7	14.23558337
TICAM2	14.23410551
PFKL	14.23309381
C15orf53	14.22978807
GLI3	14.22793759
SLC5A8	14.22270355
TMEM161B	14.22180183
KLHL14	14.22166057
BNC2	14.21708261
SNRPG	14.2165693
KIAA1147	14.21599294
ATF5	14.21505616
HDAC11	14.21095595
FOXM1	14.21033383
CNGB1	14.20881597
C6orf81	14.20858356
OSTM1	14.20706548
YWHAH	14.20557795
C1orf182	14.2051737
FXYD5	14.20268436
PLCB2	14.20256659
CIDEA	14.19585286
C19orf15	14.19007978
EGLN2	14.18953484
ZNF576	14.18618186
ZFP36L1	14.18013723
PNKP	14.17797076
DCTN4	14.17349322
C9orf82	14.16921987
SGOL1	14.16896228
B9D2	14.16784943
TMEM91	14.16784943
FLI1	14.16625024
RBM42	14.16489102
CFH	14.16422177
LRRC4B	14.16341333
PAFAH2	14.1618028
CHST9	14.16109262
ASB2	14.15837444
FBXO33	14.15834656
PTTG1IP	14.1573447
PLEKHH1	14.15692692
HSD17B12	14.15489497
BBS4	14.15435117
C1orf59	14.15071417
FER1L5	14.14869143
TLE4	14.14764236
FAM102B	14.14511839
LTB4R2	14.14399003
ARHGEF1	14.137213
FOS	14.13692766
C14orf178	14.13653955
LOC402665	14.13635399
PHACTR2	14.1271747
MRPS18A	14.12662177
NLRP4	14.12534203
USF2	14.12518556
SFMBT1	14.12405639
MYH6	14.11645233
TOX	14.11568056
TNFAIP3	14.11386788
PRKACB	14.10996668
SLC29A3	14.10898749
UGP2	14.10851466
BTN3A3	14.10640075
CLDN10	14.10472344
OTUD7A	14.10367768
RBP2	14.10155007
CBFA2T3	14.10014629
PYY	14.09564631
AFG3L2	14.09240284
PDE9A	14.09140509
UBN1	14.09053219
TSPAN8	14.08942231
CPSF3	14.088171
SHANK1	14.08115794
CASP7	14.07298214
ZDHHC17	14.0717686
FMO1	14.06715336
PVRL2	14.06141763
C22orf9	14.05893962
NLGN1	14.05633052
KCNAB2	14.05142312
CCL15	14.04929452
SH3D19	14.04892615
SENP3	14.04674021
CHGA	14.04625467
PALLD	14.04554142
TP53I3	14.04110813
HIST1H2BF	14.04020327
CHEK1	14.03982249
KCNF1	14.03767605
GATS	14.03468903
VPS54	14.03278136
PPP1R13B	14.03030286
ZBTB16	14.02796472
MT1X	14.0234478
NRAP	14.02344628
ZKSCAN4	14.02188674
MAST4	14.01980245
LEKR1	14.01931827
OR52M1	14.01813136
SDHB	14.01785111
RNF186	14.01551776
KATNAL2	14.01540397
ZNF211	14.01404398
LOC646603	14.01400865
CAMK4	14.01040274
C1orf135	14.00509467
STXBP3	14.00458278
STX6	13.99337779
OTX2	13.99336053
TUBB6	13.99263879
C6orf168	13.99240353
SYN2	13.99197836
ZNF835	13.9916491
OR11H4	13.99028469
MYO1B	13.98904001
AMIGO1	13.98361845
CYB561D1	13.98361845
ALKBH1	13.98082657
C14orf156	13.98082657
SORT1	13.98040189
DMRTC2	13.97768199
NCOA5	13.96760165
GLTSCR1	13.96574109
MIS12	13.96398804
ATP7B	13.96151025
C1orf62	13.95783209
ERCC1	13.95656631
SPTLC2	13.95655174
ZNF30	13.95430733
FHIT	13.95364463
DHRS9	13.95200791
GIMAP2	13.94836191
ABT1	13.94511328
CLSTN1	13.9430784
UBR4	13.94274329
CHPF	13.93621741
FGF14	13.93508186
ST3GAL1	13.93370668
ISL1	13.93343295
DTNB	13.93158425
TBPL1	13.93146139
TINF2	13.92863978
HIPK2	13.92738777
PAQR7	13.92513326
RDH13	13.92052266
CMA1	13.92021554
ERN2	13.9197537
SIPA1L3	13.91459315
CHI3L1	13.91451493
TNFAIP6	13.91015911
C6orf191	13.90788073
NEK9	13.90510467
SASH1	13.90074072
FAM118A	13.89917667
CCDC112	13.89815184
ZNF341	13.89612256
STK32B	13.89162502
NEGR1	13.88907787
HIST1H2AD	13.8880361
MAP3K9	13.88610475
SRD5A1	13.8844905
RIN2	13.88347319
COL5A1	13.88183959
ANGPTL2	13.87837269
NR1H2	13.87607
PRX	13.87596253
KLK2	13.8754346
TNNI3	13.87416121
KLK4	13.87327665
SLC9A9	13.87307994
KIF5C	13.87165339
CDH22	13.87012837
MAP3K4	13.86858411
THEM4	13.86313779
PPFIA1	13.86043258
ARID5B	13.85149497
GRIP1	13.84874549
HLA-DRB1	13.8450164
RGNEF	13.84444662
SLC35F2	13.84280298
IER5L	13.84172927
ZNF155	13.83885335
TNFRSF1B	13.83750863
EGF	13.834376
ESPN	13.83337483
PMPCA	13.83276119
OC90	13.83035117
RND3	13.81754746
CENPT	13.8173137
GABRB1	13.81508602
HMGA1	13.81312056
MRPS6	13.8125951
RCHY1	13.80449366
FANCA	13.80314312
TOLLIP	13.80210135
SEL1L	13.80119046
OR2AG2	13.80096895
CORT	13.80018139
MAPK14	13.79010897
ROCK2	13.78686037
CEP192	13.78684353
GRAMD1B	13.78480976
EXOSC5	13.78109042
NOVA2	13.78108943
RAB6A	13.77931217
ATXN7L2	13.77859485
RNF112	13.77817988
BCL2L12	13.77816826
ADAM22	13.77660948
EIF2B2	13.77546821
OR8U8	13.77448828
OR9G1	13.77448828
OR9G9	13.77448828
OLFM2	13.77441616
GPR125	13.77409405
FRMD4A	13.77367081
ACOT2	13.77301711
TMEM198	13.77120322
MDFI	13.77106095
ZNF790	13.76211066
DNAJC11	13.76110996
PLK1	13.75956205
ZSCAN23	13.75516917
CBS	13.75467169
COL4A1	13.7543333
ZNF616	13.75400822
SNX16	13.7522125
SLC44A5	13.74835752
GMEB2	13.74349678
MYO1D	13.73978071
KLK9	13.7369483
CHRNA10	13.73562405
EXT2	13.73041598
FAM160A2	13.72958865
IDH3B	13.72957129
TWSG1	13.72753767
SEMA3A	13.72446556
OR4K14	13.72363748
WDFY1	13.72141712
KIR2DS4	13.72122607
AGRN	13.71987234
RPS7	13.7108591
OR52K2	13.70832187
SDCBP	13.70563537
OR51E2	13.70490944
ANKRD11	13.70466702
FBXO17	13.70203061
RGS16	13.70198949
GJA1	13.70106446
ACTN4	13.69921469
USP48	13.69701406
MORC3	13.69638498
SLC16A4	13.68698506
PLAUR	13.68374707
CADPS	13.68222498
NDUFAB1	13.68008691
FMO4	13.67894246
LTA	13.67827069
ANK2	13.67793747
CSGALNACT1	13.67591089
RXRG	13.67421563
ST3GAL3	13.66599916
C4orf34	13.66531545
IL10	13.66284898
USP45	13.65979414
OR51B2	13.65907069
HSPC105	13.65512059
OXTR	13.65393142
ADAM12	13.65387285
CYP2A6	13.65339406
PCK2	13.65149591
GNG2	13.65021021
APAF1	13.64964224
GPX3	13.64955046
CCDC85A	13.64930072
ARHGEF5	13.64830728
PRPF4B	13.63895676
FLT1	13.638253
CDKN2A	13.63448203
PHACTR1	13.63383583
CRY1	13.63321638
CD79A	13.62976709
RGS7	13.6270898
RAB32	13.62527558
NDRG2	13.62361704
C7orf28A	13.62337279
ZNF324B	13.62217107
HBA2	13.62208948
CALCR	13.61941112
SGCD	13.61718784
ZNF295	13.61493083
NUCB1	13.61240653
REM1	13.60968548
C5orf49	13.60936599
PPARG	13.60727141
NMDA	13.606232
PKD1L1	13.60328427
POFUT1	13.6030215
RAPGEF1	13.60284332
AKT1S1	13.6000616
SEMG2	13.59947743
DCLK2	13.59736111
FAM155A	13.59146365
CD14	13.58949269
IL12B	13.58876181
KIAA0802	13.58534247
MYL1	13.58526771
NLRP9	13.58349386
GMPR2	13.58101356
SPATA5	13.57919582
MIA2	13.5786972
SSTR5	13.57049745
GPR146	13.57031012
ADHFE1	13.56966944
CIDEB	13.569412
SCN1B	13.56720452
GRPEL1	13.56712484
SLC25A24	13.56639264
ZNF704	13.56624893
SERPINB13	13.56516242
ZSCAN4	13.56323114
SMPDL3A	13.56021857
ALDH16A1	13.557636
PIH1D1	13.557636
OR4B1	13.55440297
C10orf120	13.54648879
TBCEL	13.54648879
H6PD	13.54555019
LILRA5	13.54426619
COL4A3	13.54370138
C1orf31	13.5404019
FYB	13.53887436
ZNF784	13.53871965
DLAT	13.53856643
DNAJC2	13.53279482
SYT2	13.5280516
MCM8	13.52588742
PKP2	13.52559065
CPAMD8	13.5193703
CRH	13.51928465
KCTD1	13.51838102
NPTN	13.51557762
ZADH2	13.51534638
GOSR2	13.50991208
KAT2B	13.49901458
CAPS2	13.49432808
PPP5C	13.4862855
GNG12	13.48626118
PLAGL1	13.48021278
A1BG	13.47954974
HTR1B	13.47939773
PPL	13.47926434
MAP7	13.47594309
DGUOK	13.47583058
TASP1	13.47389001
CEACAM21	13.46880172
PADI2	13.46718819
PADI3	13.46601608
C14orf21	13.46567671
PSMC4	13.46504398
RSPO4	13.46219876
ZNF528	13.4607692
YES1	13.45987377
SOS2	13.45567776
ARHGAP24	13.45291387
ZSCAN2	13.45291387
ITPR3	13.45105651
REPS1	13.45054056
RRP1	13.44794526
FLJ10490	13.44305645
ALLC	13.44164293
POLR3A	13.44157484
COPS3	13.43821834
VRK3	13.43719056
GZMB	13.43640334
ANKRD12	13.43374417
CS	13.43042214
SLC17A6	13.42711664
TTC39C	13.42377281
ZNF187	13.42109816
ACE	13.42063273
MKNK1	13.41686499
C14orf105	13.41511568
KMO	13.4145029
POLE4	13.4128251
TTLL12	13.4059781
SIGLEC10	13.39896524
STAB1	13.39794001
PPM1A	13.39739875
ECH1	13.39652612
ACIN1	13.39496374
KCNK13	13.39139783
ZCCHC8	13.39018904
OR4E2	13.38890353
ZNF404	13.388582
TFF1	13.38759412
DCTD	13.38580974
XRCC2	13.38567187
ZNF611	13.3837395
ZNF214	13.38207409
PAX4	13.38169462
CPVL	13.38053639
SFRS3	13.37983867
CTDSPL	13.37731525
[truncated: 8,832 more rows]
